# Supplementary material for: Amiloride, An Old Diuretic Drug, Is a Potential Therapeutic Agent for Multiple Myeloma
Source: Oxford University Press journal article supplement (doi:10.1158/1078-0432.ccr-17-0678), 2017-08-08
Supplement: 10780432ccr170678-sup-180101_2_supp_4173964_ttftnx.pdf [file 10780432ccr170678-sup-180101_2_supp_4173964_ttftnx.pdf]

## Supplemental Material

### Supplemental Experimental Procedures

#### 1. Evaluation of the combinations of amiloride with other anti-myeloma agents

Cells were treated for 24, 48 and 72 hours with double combinations at different doses of amiloride and other antimyeloma agents. Cell viability was analyzed by MTT assay and a constant ratio experimental design was used. The potency of each combination in different cell lines was quantified with the Calcosyn software (Biosoft, Ferguson, MO, USA), which is based in the Chou Talalay method and calculates a combination index (CI) with the following interpretation:

| Combination index | Interpretation     |
|-------------------|--------------------|
| <0.3,             | strong synergism   |
| 0.3-0.7           | synergism          |
| 0.7-0.85          | moderate synergism |
| 0.85-0.90         | slight synergism   |
| 0.90-1.10         | additive effect    |
| >1.10             | antagonism         |

#### 2. Effect of MSCs on amiloride-induced growth inhibition

The methods for isolation and expansion of MSCs have been described by Garayoa *et al.* (1). Next, the MSCs were plated in 96-well culture dishes (8000/well) (3 biological replicates) and allowed to reach confluence during 48 hours. Then, medium was removed and 20,000 luciferase-expressing myeloma cells (MM1S-luc) in RPMI 1640 containing 10% fetal bovine serum were plated on top of the MSCs and treated for 48 hours with different concentrations of amiloride. After the incubation period, luciferin substrate (Caliper Life Sciences, Hopkinton, MA) at a final concentration of 150 g/mL was added for 10 minutes and bioluminescence (photons/sec) was analyzed in a Xenogen IVIS Imaging System 50 Series (Caliper Life Sciences).

### **3. MM xenograft murine model**

To fit the tumor growth curves, we used the exponential model  $y = A \cdot e^{kx}$  resorting to the EXFIT option of the SIMFIT package ([www.simfit.org.uk](http://www.simfit.org.uk)). The  $k$  parameter corresponds to the tumor growth rate and the  $A$  parameter to the initial tumor size. The  $k$  parameter together with its standard error ( $Sk$ ) were extracted for each condition to compare the different drug experiments. The regression parameters comparison was carried out using a t-test for unequal variances. The area under the curve (AUC) for each growth curve was calculated by cubic splines fitting using the COMPARE option of SIMFIT. Differences between each pair of AUCs were tested, inside the x-overlap window of both curves, using COMPARE under the formula  $200(A0)/(B1+B2)$ , with  $A0$  being the integral of the absolute difference between curves 1 and 2,  $B1$  and  $B2$  being the AUC of both curves considering a zero-base line for the  $y$  values. Differences between curves were expressed as percentages”

### **4. Immunoblotting**

Whole cell lysates were collected using RIPA buffer (Santa Cruz Biotechnology) containing protease and phosphatase inhibitors (Roche). Protein samples were subjected to SDS-PAGE electrophoresis and transferred to 0.45  $\mu$ m polyvinylidene fluoride (PVDF) membrane using iBlot® Dry Blotting System (Invitrogen). The antibodies used for immunoblotting were: anti-p53 protein (Cell Signaling) and anti- $\beta$ -actin-HRP (Sigma-Aldrich) as control for protein loading. The chemiluminescence was detected using Clarity Western ECL Substrate (BioRad).

### **5. RNA sequencing**

Twelve total RNAs were measured for quantity and quality using Agilent 2100 Bioanalyzer (Agilent Technologies). All samples reached the minimum standards, concentrations higher than 200 ng/ $\mu$ l and RIN values over 8.0. Libraries were constructed following a TruSeq Stranded mRNA Sample Preparation Guide (Illumina). Briefly, mRNA was purified from 4  $\mu$ g of total RNA using oligo (dT) magnetic beads. The purified mRNA was fragmented into small pieces using fragmentation buffer in

combination of heat treatment (94°C, 8 min). Taking these short fragments as templates, first-strand cDNA was synthesized using reverse transcriptase and random hexamer primers. The addition of Actinomycin D prevents spurious DNA-dependent synthesis, while allowing RNA-dependent synthesis, improving strand specificity detection. Second-strand cDNA synthesis was followed using RNase H, which removes the RNA template, and a DNA polymerase I which synthesizes a replacement strand, incorporating dUTP in place of dTTP to generate ds cDNA. The incorporation of dUTP quenches the second strand during amplification, because the next polymerase does not incorporate past this nucleotide in further amplification. At the end of this process a blunt-ended cDNA is obtained. Indexes and sequencing adapters were ligated to short cDNA fragments after purification with Ampure XP beads (Beckman Coulter), and which were used to distinguish different sequencing samples.

The final cDNA library was generated with an amplification step and purification process, then libraries were first quantified and validated with Agilent 2100 Bioanalyzer (Agilent Technologies). Next, libraries were normalized and pooled for clustering generation and sequencing using Illumina HiSeq™ 2500 with a configuration of 100 cycles Paired-end Reads, following manufacturer's instructions (Illumina), at Life sequencing S.L. (Valencia, Spain).

## **6. RNA sequencing analysis**

All sequencing software tools were run with the default or recommended settings. RNA-Seq analysis was carried out in eight cores and 32 GB of RAM computer. The operating system was Ubuntu 14.04.2 LTS using version of X\_86 64 bits. Paired-end FASTQ files for 12 samples were used in the RNA-Seq analyses. Adapter and quality trimming was done by the cutadapt tool version v1.4 (<http://dx.doi.org/10.14806/ej.17.1.200>) removing all bases with a Phred quality average threshold < 20 (Q < 20). FASTQ files quality was assessed using FASTQC (<http://www.bioinformatics.bbsrc.ac.uk/projects/fastqc/>) before and after the trimming process. The trimmed reads were mapped against the Homo sapiens genome

GRCh37 assembly obtained from Ensembl (<http://www.ensembl.org/data/ftp/index.html>) using in a first step the Bowtie2 aligner version 2.2.6 (2), in order to find the mean insert size to calculate the mean mate inner distance for each sample. The reads were then re-aligned using the TopHat v2.0.11 aligner (3). TopHat writes read data in the BAM format which is the binary version of the Sequence Alignment/Map (SAM) files, these files were used for downstream analyses at gene and isoform levels.

Regarding the gene level analyses, HTSeq version 0.6.0 was used to count the number of reads per gene from BAM files (4) considering the intersection-strict model whereby the whole read must fall entirely inside the feature to be counted. Reads that align multiple features are deleted to avoid double counting, and using GRCh37.82.gtf file from Ensembl as gene model. Low expression genes (those whose sums of reads were  $\leq 1$  in all samples) were removed. After the filtering process, the remaining genes were normalized dividing the counts by the sample-specific size factors, estimated using the median ratio method (5). Based on normalized count data, DESeq2 R package version 1.12.3 (6) (<http://doi.org/10.1186/s13059-014-0550-8>) modelled gene expression according a negative binomial distribution and generated a list of genes ranked based on the false discovery rate (FDR) using the Benjamini-Hochberg procedure.

The alternative splicing isoforms were detected using cufflinks version 2.2.1 following the Tuxedo pipeline (7). The isoforms were analyzed following 2 sequential approaches. First, a global analysis of isoforms was carried out considering all the isoforms with an absolute value of fold change ( $|FC| \geq 2$ ) as differentially expressed between the contrasted conditions and using them for further analysis. Second, only the isoforms with a  $|FC| \geq 2$  between contrasted conditions corresponding to genes without expression modifications were considered. These genes were those not identified as a significant ( $FDR > 0.05$  and  $|FC| < 2$ ) by the DESeq2 package. The resulting isoforms were also used for downstream analysis.

Differential alternative splicing events were detected using rMATS version 3.0.9 (8), which identifies the number of observed reads that unambiguously support the presence or absence of each splicing event. Most of the significant AS events ( $FDR < 0.05$ ) were classifying into five main types of pattern: patterns: skipped exon (SE), alternative 5' splice site (A5SS), alternative 3' splice site (A3SS), mutually exclusive exons (MXE) and retained introns (RIs). rMATS also calculates the difference in the ratio of these events between two conditions, calculating a false discovery rate.

The enrichment analysis was conducted through the Webgestalt web tool (9) in all analysis levels, using as data sources the Gene Ontology and the KEGG databases.

## Supplemental tables

**Supplemental Table 1.** Molecular classification of human myeloma cell lines (HMCLs) as previously described (10–12). OD: oligomerization domain; DBD: DNA-binding domain.

|   | HMCLs Name | IGH translocations | TP53 status    | Mutation | Type of mutation | Domain of p53 |
|---|------------|--------------------|----------------|----------|------------------|---------------|
| 1 | NCI-H929   | t(4;14)            | wild type (WT) | -        | -                | -             |
| 2 | JJN3       | t(14;16)           | deletion (DEL) | -        | -                | -             |
| 3 | KMS12-BM   | t(11;14)           | mutated (MUT)  | R337L    | missense         | OD            |
| 4 | KMS12-PE   | t(11;14)           | mutated (MUT)  | R337L    | missense         | OD            |
| 5 | U-266      | CCND1 insertion    | mutated (MUT)  | A161T    | missense         | DBD           |
| 6 | MM1S       | t(14;16)           | wild type (WT) | -        | -                | -             |
| 7 | RPMI-8226  | t(14;16)           | mutated (MUT)  | E285K    | missense         | DBD           |

**Supplemental Table 2. Patients' characteristics**

| Code | Patient No. | Age | Gender | Disease status         | Treatment                         | FISH 17p | Experiments                                                                |
|------|-------------|-----|--------|------------------------|-----------------------------------|----------|----------------------------------------------------------------------------|
| P1   | 42394       | 55  | M      | Newly-diagnosed        |                                   | normal   | Citotoxicity of amiloride on PC from total BM sample                       |
| P2   | 42532       | 87  | M      | Newly-diagnosed        |                                   | normal   | Citotoxicity of amiloride on PC from total BM sample                       |
| P3   | 42598       | 87  | F      | Newly-diagnosed        |                                   | normal   | Citotoxicity of amiloride on PC from total BM sample                       |
| P4   | 42869       | 83  | M      | Newly-diagnosed        |                                   | deletion | Citotoxicity of amiloride on PC from total BM sample                       |
| P5   | 50393       | 83  | F      | Newly-diagnosed        |                                   | normal   | Citotoxicity of amiloride on PC from total BM sample                       |
| P6   | 43449       | 63  | M      | Refractory/Progression | VTD/VDL-PACE/pembrolizumab-LD     | deletion | Citotoxicity of amiloride on PC from total BM sample                       |
| P7   | 43226       | 63  | M      | Refractory             | VTD-ASCT/ixazomib maintenance/KRD | deletion | Citotoxicity of amiloride on PC from total BM sample                       |
| P8   | 32585       | 72  | M      | Relapse                | VMP                               | normal   | Citotoxicity of amiloride on PC from total BM sample                       |
| P9   | 50616       | 76  | M      | Newly-diagnosed        |                                   | normal   | Citotoxicity of amiloride on PC from total BM sample                       |
| P10  | 47687       | 73  | M      | Refractory             | VMP                               | normal   | Citotoxicity of amiloride on PC from total BM sample                       |
| P11  | 50150       | 84  | F      | Newly-diagnosed        |                                   | normal   | Cell viability and RNA isolation of CD138+ fraction treated with amiloride |
| P12  | 50161       | 61  | F      | Newly-diagnosed        |                                   | normal   | Cell viability and RNA isolation of CD138+ fraction treated with amiloride |
| P13  | 50160       | 46  | M      | Newly-diagnosed        |                                   | normal   | Cell viability and RNA isolation of CD138+ fraction treated with amiloride |
| P14  | 40420       | 81  | M      | Relapse                | VMP/LD                            | normal   | Cell viability and RNA isolation of CD138+ fraction treated with amiloride |
| P15  | 50204       | 83  | F      | Newly-diagnosed        |                                   | normal   | Cell viability and RNA isolation of CD138+ fraction treated with amiloride |
| P16  | 50207       | 69  | F      | Relapse                | VMP                               | normal   | Cell viability and RNA isolation of CD138+ fraction treated with amiloride |
| P17  | 48886       | 58  | F      | Refractory             | VTD                               | normal   | Cell viability and RNA isolation of CD138+ fraction treated with amiloride |
| P18  | 50007       | 84  | F      | Newly-diagnosed        |                                   | normal   | Cell viability and RNA isolation of CD138+ fraction treated with amiloride |

**Supplemental Table 3.** Amiloride-induced transcript isoforms expression changes of genes which encode proteins involved in spliceosome complex and its regulation. Only common transcript isoforms in both cell lines are shown. The direction of the change upon amiloride treatment is indicated ( $FC \geq 2$ : upregulation or  $FC \leq -2$ : downregulation), and the proteins are classified according to the spliceosome complexes to which they belong. The transcript isoforms with a  $\log_2(FC) = 99$  were those transcripts only expressed in amiloride treated-cells; and the transcript isoforms with  $\log_2(FC) = -99$  were those transcripts only expressed in control cells.

| Gene Symbol | Transcript      | KMS12-BM<br>$\log_2(FC)$ | JJN3<br>$\log_2(FC)$ | Protein | Spliceosome complex                       |
|-------------|-----------------|--------------------------|----------------------|---------|-------------------------------------------|
| SNRPC       | ENST00000244520 | 7.14                     | 1.22                 | 159 aa  | U1 snRNP                                  |
| SF3A2       | ENST00000586396 | -1.21                    | -1.69                | 135 aa  | U2 snRNP                                  |
| U2AF1       | ENST00000464750 | 6.22                     | 99.00                | 75 aa   | U2 snRNP-related                          |
| EIF4A3      | ENST00000576547 | -9.93                    | -8.82                | 125 aa  | EJC/TREX complex                          |
| SRSF1       | ENST00000258962 | 16.04                    | 1.10                 | 248 aa  | common component (SR protein)             |
| SRSF10      | ENST00000259043 | 7.78                     | 7.64                 | 127 aa  | common component (SR protein)             |
| HNRNPC      | ENST00000556513 | 4.44                     | 7.33                 | 231 aa  | common component (hnRNP protein)          |
| HNRNPC      | ENST00000553753 | 1.01                     | 1.49                 | 288 aa  |                                           |
| HNRNPC      | ENST00000420743 | 1.78                     | 99.00                | 306 aa  |                                           |
| HNRNPC      | ENST00000555215 | 99.00                    | 4.14                 | 187 aa  |                                           |
| HNRNPC      | ENST00000557768 | 3.22                     | 1.99                 | 54 aa   |                                           |
| TXNL4A      | ENST00000269601 | 99.00                    | 99.00                | 142 aa  | U5 snRNP and U4/U6-U5 tri-snRNP complexes |
| TXNL4A      | ENST00000588162 | -99.00                   | -99.00               | 57 aa   |                                           |



**Supplemental Table 4.** Amiloride-induced transcript expression changes of genes involved in p53 pathway in KMS12-BM cell line. The direction of the change upon amiloride treatment is indicated ( $FC \geq 2$ : upregulation or  $FC \leq -2$ : downregulation). The transcript isoforms with a  $\log_2 (FC) = 99$  were those transcripts only expressed in amiloride treated-cells; and the transcript isoforms with  $\log_2 (FC) = -99$  were those transcripts only expressed in control cells.

| Gene Symbol | Transcript      | $\log_2 (FC)$ | Biotype                 | Protein    |
|-------------|-----------------|---------------|-------------------------|------------|
| CDK4        | ENST00000547853 | 99.00         | Protein coding          | 2 aa       |
| CDK4        | ENST00000550419 | 1.06          | Nonsense mediated decay | 201 aa     |
| CDK4        | ENST00000546489 | -99.00        | Protein coding          | 208 aa     |
| CDK4        | ENST00000552254 | 1.70          | Protein coding          | 203 aa     |
| CDK4        | ENST00000549606 | 3.88          | Protein coding          | 40 aa      |
| CDK4        | ENST00000547281 | -1.21         | Protein coding          | 186 aa     |
| CDK4        | ENST00000552862 | 3.26          | Protein coding          | 115 aa     |
| CDK4        | ENST00000551800 | -99.00        | Protein coding          | 132 aa     |
| CDK4        | ENST00000312990 | 1.01          | Protein coding          | 111 aa     |
| CDK4        | ENST00000257904 | -4.83         | Protein coding          | 303 aa     |
| CDK4        | ENST00000551888 | 6.00          | Processed transcript    | no protein |
| CDK4        | ENST00000552388 | -1.48         | Protein coding          | 170 aa     |
| CDK4        | ENST00000551706 | 3.52          | Retained intron         | no protein |
| TP53        | ENST00000514944 | 99.00         | Protein coding          | 155 aa     |
| TP53        | ENST00000505014 | 99.00         | Retained intron         | no protein |
| TP53        | ENST00000269305 | 4.17          | Protein coding          | 393 aa     |
| CHEK1       | ENST00000532669 | 1.08          | Protein coding          | 192 aa     |
| CHEK1       | ENST00000438015 | -2.05         | Protein coding          | 476 aa     |
| CHEK1       | ENST00000544373 | -7.36         | Protein coding          | 382 aa     |
| CHEK1       | ENST00000532449 | -99.00        | Protein coding          | 442 aa     |
| CHEK1       | ENST00000278916 | 99.00         | Protein coding          | 432 aa     |
| CHEK1       | ENST00000498122 | -99.00        | Nonsense mediated decay | 89 aa      |
| CHEK1       | ENST00000427383 | -99.00        | Protein coding          | 492 aa     |
| CHEK1       | ENST00000528761 | 99.00         | Processed transcript    | no protein |
| CHEK1       | ENST00000524737 | -99.00        | Protein coding          | 476 aa     |
| SHISA5      | ENST00000417841 | 99.00         | Protein coding          | 112 aa     |
| SHISA5      | ENST00000466424 | -99.00        | Processed transcript    | no protein |
| SHISA5      | ENST00000426002 | -4.64         | Protein coding          | 137 aa     |
| SHISA5      | ENST00000460758 | 1.62          | Retained intron         | no protein |
| CCNB1       | ENST00000506572 | -2.40         | Protein coding          | 401 aa     |
| CCNB1       | ENST00000508407 | 99.00         | Protein coding          | 244 aa     |
| CCNB1       | ENST00000507798 | 1.87          | Protein coding          | 185 aa     |
| CCNB1       | ENST00000505500 | -10.47        | Protein coding          | 396 aa     |
| BID         | ENST00000473439 | -1.53         | Processed transcript    | no protein |
| BID         | ENST00000399765 | 2.57          | Protein coding          | 99 aa      |
| SESN1       | ENST00000520364 | 5.51          | Retained intron         | no protein |

|        |                 |        |                         |            |
|--------|-----------------|--------|-------------------------|------------|
| SESN1  | ENST00000523632 | -5.86  | Retained intron         | no protein |
| SESN1  | ENST00000356644 | 1.30   | Protein coding          | 492 aa     |
| SESN1  | ENST00000368971 | -5.92  | Retained intron         | no protein |
| CDK1   | ENST00000519078 | 1.04   | Protein coding          | 189 aa     |
| CDK1   | ENST00000373809 | 2.74   | Protein coding          | 240 aa     |
| CDK1   | ENST00000395284 | -99.00 | Protein coding          | 297 aa     |
| CCND1  | ENST00000535993 | -99.00 | Retained intron         | no protein |
| CCND1  | ENST00000542367 | -99.00 | Retained intron         | no protein |
| RFWD2  | ENST00000367667 | 11.86  | Nonsense mediated decay | 113 aa     |
| RFWD2  | ENST00000367666 | -1.58  | Protein coding          | 566 aa     |
| RRM2B  | ENST00000519125 | -5.73  | Retained intron         | no protein |
| RRM2B  | ENST00000519317 | 1.17   | Protein coding          | 139 aa     |
| BAX    | ENST00000345358 | -99.00 | Protein coding          | 192 aa     |
| BAX    | ENST00000515540 | -1.81  | Nonsense mediated decay | 41 aa      |
| GTSE1  | ENST00000491863 | 6.92   | Retained intron         | no protein |
| ATR    | ENST00000383101 | -1.74  | Protein coding          | 2580 aa    |
| PERP   | ENST00000421351 | 3.78   | Protein coding          | 193 aa     |
| CDKN2A | ENST00000361570 | 99.00  | Protein coding          | 170 aa     |
| CDKN2A | ENST00000498628 | -1.15  | Protein coding          | 105 aa     |

## References

1. Garayoa M, Garcia JL, Santamaria C, Garcia-Gomez A, Blanco JF, Pandiella A, et al. Mesenchymal stem cells from multiple myeloma patients display distinct genomic profile as compared with those from normal donors. *Leukemia*. 2009;23:1515–27.
2. Langmead B, Salzberg SL. Fast gapped-read alignment with Bowtie 2. *Nat Methods*. 2012;9:357–9.
3. Kim D, Pertea G, Trapnell C, Pimentel H, Kelley R, Salzberg SL. TopHat2: accurate alignment of transcriptomes in the presence of insertions, deletions and gene fusions. *Genome Biol*. 2013;14:R36.
4. Anders S, Pyl PT, Huber W. HTSeq--a Python framework to work with high-throughput sequencing data. *Bioinforma Oxf Engl*. 2015;31:166–9.
5. Anders S, Huber W. Differential expression analysis for sequence count data. *Genome Biol*. 2010;11:R106.
6. Love MI, Huber W, Anders S. Moderated estimation of fold change and dispersion for RNA-seq data with DESeq2. *Genome Biol*. 2014;15:550.
7. Trapnell C, Roberts A, Goff L, Pertea G, Kim D, Kelley DR, et al. Differential gene and transcript expression analysis of RNA-seq experiments with TopHat and Cufflinks. *Nat Protoc*. 2012;7:562–78.
8. Shen S, Park JW, Lu Z, Lin L, Henry MD, Wu YN, et al. rMATS: robust and flexible detection of differential alternative splicing from replicate RNA-Seq data. *Proc Natl Acad Sci U S A*. 2014;111:E5593-5601.
9. Wang J, Duncan D, Shi Z, Zhang B. WEB-based GEne SeT AnaLysis Toolkit (WebGestalt): update 2013. *Nucleic Acids Res*. 2013;41:W77-83.
10. Surget S, Descamps G, Brosseau C, Normant V, Maïga S, Gomez-Bougie P, et al. RITA (Reactivating p53 and Inducing Tumor Apoptosis) is efficient against TP53abnormal myeloma cells independently of the p53 pathway. *BMC Cancer*. 2014;14:437.
11. Moreaux J, Klein B, Bataille R, Descamps G, Maïga S, Hose D, et al. A high-risk signature for patients with multiple myeloma established from the molecular classification of human myeloma cell lines. *Haematologica*. 2011;96:574–82.
12. Teoh PJ, Chung TH, Sebastian S, Choo SN, Yan J, Ng SB, et al. p53 haploinsufficiency and functional abnormalities in multiple myeloma. *Leukemia*. 2014;28:2066–74.

## Supplemental Figure Legends

**Figure S1. (A) Protein expression of p53 in MM cell lines.** Basal protein level of p53 was analyzed by Western blot in 7 MM cell lines.  $\beta$ -actin was used as loading control. **(B) Cell viability of isolated CD138+ cells from MM patients.** Cells were treated with the indicated doses of amiloride for 24 h and cell viability was analyzed by CellTiter-Glo luminescent assays. The average of luminescent values of control untreated samples was taken as 100%. The statistically significant differences between untreated and treated cells were determined with Student's t-test and represented as  $***p < 0.001$  **(C)** BM cells obtained from four donors were treated *ex vivo* with increasing concentrations of amiloride for 48 h. After the incubation period, cells were stained with the combination of annexin-V-FITC and five monoclonal antibodies (CD38-APC-H7, CD45-OC515, CD56-PE, CD19-PECy7 and CD3-APC) for the analysis of apoptosis in plasma cells and T lymphocytes (CD3+), B lymphocytes (CD19+), NK cells (CD56+/CD3-) and granulocytes (SSChigh/CD45+dim). Results are presented as the percentage of Annexin V-positive cells (Mann–Whitney U test).

**Figure S2. (A)** Melphalan resistant MM cell line RPMI-LR5 (panel left) and dexamethasone resistant MM cell line MM1R (panel right) were treated with the indicated doses of amiloride for 24, 48 and 72 h, and cell viability was analyzed by CellTiter-Glo luminescent assays. The average of luminescent values of control untreated samples was taken as 100%. Results are the means of three independent experiments. The statistically significant differences between untreated and treated cell lines were determined with Student's t-test. **(B,C,D)** MM cell lines were treated with the indicated double combinations of amiloride with dexamethasone or melphalan or **(E)** bortezomib. Cell viability was analyzed by MTT assay as represented in the graphs and the combination indexes (CI) were calculated with the Calcosyn software. CIs of  $< 0.3$ ,  $0.3-0.7$ ,  $0.7-0.85$ ,  $0.85-0.90$ ,  $0.9-1.10$ , and  $> 1.10$  indicate strong synergism, synergism, moderate synergism, slight synergism, additive effect, and antagonism,

respectively. C: control; A: amiloride; D: dexamethasone; M: melphalan; B: bortezomib; d1, d2 and d3: drug concentrations used in the study; CR: constant ratio.

**Figure S3. (A)** MM1S-luc cells were treated for 48 hours with the indicated concentrations of amiloride in the presence or absence of MSCs derived from newly-diagnosed (ND) and relapsed/refractory (RR) MM patients, and proliferation was analyzed by bioluminescence (photons/sec). The statistically significant differences between untreated and treated cocultured cells were determined with Student's t-test and represented as  $^{**}p < 0.01$  **(B)** MSCs were cultured with different doses of amiloride for 48 hours, and cell viability was analyzed by CellTiter-Glo luminescent assays. The statistically significant differences between untreated and treated cells were determined with Student's t-test and represented as  $^{**}p < 0.01$

**Figure S4. Amiloride induced apoptosis in MM cells.** H929, KMS12-BM, JJN3 cells **(A)** and MM1S, U-266 and RPMI **(B)** were treated with increasing concentrations of amiloride for 48 h, and the induction of apoptosis was analyzed by flow cytometry after annexin-V/PI staining. Data are the means  $\pm$  SD of three independent experiments. Statistically significant differences between untreated and treated cell lines are represented as  $^{**}p < 0.01$  (Student's t-test).

**Figure S5. Amiloride did not induce changes in the cell cycle profile of MM cells.** The indicated MM cell lines were incubated with increasing concentrations of amiloride for 48 h and the cell cycle was analyzed by flow cytometry. (A) Data are the means  $\pm$  SD of three independent experiments. (B) The histograms show the phases of the cell cycle, including the subG1 peak. Statistically significant differences between untreated and treated cell lines are represented as  $^{***}p < 0.001$ ,  $^{**}p < 0.01$  and  $^{*}p < 0.05$  (Student's t-test).

**Figure S6. Amiloride deregulated mitochondrial potential in MM cells.** The indicated MM cell lines were incubated with increasing concentrations of amiloride for 24 h and the mitochondrial membrane depolarization was examined by flow cytometry after DiIC1(5) staining (MitoStep). Dark grey color represented the depolarized cells

and grey color the cells without mitochondrial membrane depolarization. Data are the means  $\pm$  SD of three independent experiments. Statistically significant differences between untreated and treated cell lines are represented as  $**p < 0.01$  and  $*p < 0.05$  (Student's t-test).

**Figure S7. Activity of amiloride through caspase-dependent and independent mechanisms.** **(A)** The activity of caspase 8, caspase 9 and caspase 3/7 was analyzed by luminescent caspase assays in different MM cell lines. **(B)** Pharmacologic inhibition of the activity of caspases with the pan-caspase inhibitor Z-VAD-FMK. MM1S and KMS12-BM cells were preincubated with the pan-caspase inhibitor (50 nM) for one hour and then were treated with amiloride (MM1S at 0.2 mM, and KMS12-BM at 0.1 mM) for 24 additional hours. The abrogated activity of caspase 3/7 was corroborated by luminescent caspase assay. Bortezomib (MM1S at 5 nM, and KMS12-BM at 10 nM) was used as positive control of caspase-dependent mechanism. Data are the means  $\pm$  SD of three independent experiments. Statistically significant differences between untreated and treated cell lines are represented as  $**p < 0.01$  and  $*p < 0.05$  (Student's t-test).

**Figure S8. The triple and double combination of dexamethasone and melphalan with amiloride displayed superior anti-MM activity and improved median survival compared with single agents and double combinations in a subcutaneous plasmacytoma model.** CB17-SCID mice subcutaneously inoculated with  $3 \times 10^6$  MM1S cells in the right flank were randomized to receive vehicle, amiloride (15 mg/kg, oral, daily), dexamethasone (0.5 mg/kg, i.p., 2 days weekly), melphalan (2.5 mg/kg, i.p., 2 days weekly) in monotherapy and the respective double and triple combinations ( $n = 5/\text{group}$ ). **(A)** Evolution of tumor volumes of the plasmacytomas. Statistical differences between groups were evaluated fitting an exponential regression model and the regression parameters were compared using a *t*-test for unequal variances. and represented as  $*p < 0.05$ . Bars indicate standard errors of the mean. **(B)** Kaplan-Meier curves representing the survival of each treatment group. Mice were sacrificed

when their tumor diameters reached 2 cm or when they became moribund. Statistically significant differences were analyzed by the log-rank test, and represented as  $**p < 0.01$  and  $*p < 0.05$ . **(C)** The toxicity profile of drugs *in vivo*, showed a lower body weight loss in all treated mice. It is represented as percentage of mouse body weight variation during the study in the xenograft plasmacytoma.

**Figure S9. Experimental design for RNA-Seq assay.** KMS12-BM and JJN3 cell lines, untreated or treated with amiloride (0.1 mM and 0.4 mM, respectively) for 24 h. The RNA was isolated and prepared for next-generation sequencing analysis.

**Figure S10. Pathway enrichment analysis at gene level and differential transcript isoforms expression. (A)** Summary of the biologically relevant pathways significantly enriched in KEGG analysis for amiloride-deregulated genes detected in KMS12-BM and JJN3 cell lines. Statistical significance of the enrichment was expressed as  $-\log_{10}$  (Benjamini-Hochberg adjusted  $p$  - value). **(B)** Differential expression of transcript isoforms. Deregulates transcript isoforms were identified using Cufflinks following the Tuxedo pipeline when untreated and treated cell lines were compared. Only the isoforms that have a  $|FC| \geq 2$  were considered as differentially expressed.

**Figure S11. Validation of spliceosomal machinery alterations (A)** CB17-SCID mice were subcutaneously inoculated into the right flank with  $3 \times 10^6$  MM1S (*TP53* WT;  $n = 6$ ) cells or RPMI (*TP53* MUT;  $n = 4$ ) cells in 100  $\mu$ L of RPMI-1640 medium and 100  $\mu$ L of Matrigel. After 11 weeks, when tumors had a large size, all mice were randomized into 2 groups, the control groups receiving the vehicle alone-PBS and the amiloride treatment groups receiving 20 mg/kg/day for two consecutive days, orally. Mice were sacrificed at third day and SC35-staining nuclear speckles detected by immunofluorescence assays. The figure shows the results corresponding to all mice. **(B)** CD138+ cells from one newly-diagnosed MM patient were treated with amiloride for 24 hours and SC35-staining nuclear speckles detected by immunofluorescence assay. **(C)** CD138+ cells from MM patients were treated with amiloride for 24 hours and the mRNA levels of spliceosome components were tested. The results are shown as the

magnitude of change between treated and untreated cells, using 18S rRNA as endogenous control. Results are combined to those from RNA-Seq results.

**Figure S12. Validation of gene expression.** The mRNA levels of *BBC3 (PUMA)*, *BAX*, *BAK1*, *CDKN1A (p21)*, *CDKN1B*, *TNFRSF10B* and *FAS (CD95)* were assessed by qRT-PCR. Results are the mean of three independent experiments. The direction of the fold change detected in the mRNA levels evaluated by both RNA-Seq data and qRT-PCR, concur.

**Figure S13. Validation of p53 pathway activation in patient cells.** CD138+ cells from MM patients were treated with amiloride for 24 hours and the mRNA levels of p53 signaling pathway were tested. The results are shown as the magnitude of change between treated and untreated cells, using 18S rRNA as endogenous control. Statistically significant differences between untreated and treated cell lines are represented as \*\*\* $p < 0.001$ , \*\* $p < 0.01$  and \* $p < 0.05$  (Student's t-test).
